# Supplementary material
Source: MDPI journal article supplement (https://www.mdpi.com/1999-4907/14/9/1732)
Supplement: s1 [file s1]

**Table S1.** The list of 89 food plants for the Hainan gibbon based on monitoring data in Bawangling Nature Reserve, Hainan Tropical Rainforest National Park.

| Family           | Genus                  | Species name                                                         |
|------------------|------------------------|----------------------------------------------------------------------|
| Anacardiaceae    | <i>Allospondias</i>    | <i>Allospondias lakonensis</i> (Pierre) Stapf                        |
| Annonaceae       | <i>Monoon</i>          | <i>Monoon laui</i> (Merr.) B. Xue & R. M. K. Saunders                |
| Apocynaceae      | <i>Wrightia</i>        | <i>Wrightia pubescens</i> R. Br.                                     |
| Apocynaceae      | <i>Tabernaemontana</i> | <i>Tabernaemontana bovina</i> Loureiro                               |
| Aquifoliaceae    | <i>Ilex</i>            | <i>Ilex kobuskiana</i> S. Y. Hu                                      |
| Araliaceae       | <i>Heptapleurum</i>    | <i>Heptapleurum heptaphyllum</i> (L.) Y. F. Deng                     |
| Burseraceae      | <i>Canarium</i>        | <i>Canarium album</i> (Lour.) DC.                                    |
| Cannabaceae      | <i>Gironniera</i>      | <i>Gironniera subaequalis</i> Planch.                                |
| Clusiaceae       | <i>Garcinia</i>        | <i>Garcinia oblongifolia</i> Champ. ex Benth.                        |
| Cornaceae        | <i>Alangium</i>        | <i>Alangium chinense</i> (Lour.) Harms                               |
| Cornaceae        | <i>Alangium</i>        | <i>Alangium salviifolium</i> L. f.) Wanger.                          |
| Dilleniaceae     | <i>Dillenia</i>        | <i>Dillenia turbinata</i> Finet et Gagnep.                           |
| Dipterocarpaceae | <i>Hopea</i>           | <i>Hopea hainanensis</i> Merr. & Chun                                |
| Ebenaceae        | <i>Diospyros</i>       | <i>Diospyros susarticulata</i> Lec.                                  |
| Elaeocarpaceae   | <i>Elaeocarpus</i>     | <i>Elaeocarpus rugosus</i> Roxburgh                                  |
| Elaeocarpaceae   | <i>Elaeocarpus</i>     | <i>Elaeocarpus angustifolius</i> Blume                               |
| Elaeocarpaceae   | <i>Elaeocarpus</i>     | <i>Elaeocarpus dubius</i> A. DC.                                     |
| Escalloniaceae   | <i>Polyosma</i>        | <i>Polyosma cambodiana</i> Gagnep.                                   |
| Euphorbiaceae    | <i>Hancea</i>          | <i>Hancea hookeriana</i> Seem.                                       |
| Euphorbiaceae    | <i>Macaranga</i>       | <i>Macaranga sampsonii</i> Hance                                     |
| Euphorbiaceae    | <i>Triadica</i>        | <i>Triadica cochinchinensis</i> Loureiro                             |
| Euphorbiaceae    | <i>Epiprinus</i>       | <i>Epiprinus siletianus</i> (Baill.) Croiz.                          |
| Euphorbiaceae    | <i>Endospermum</i>     | <i>Endospermum chinense</i> Benth.                                   |
| Fagaceae         | <i>Castanopsis</i>     | <i>Castanopsis hystrix</i> J. D. Hooker et Thomson ex A. De Candolle |
| Fagaceae         | <i>Castanopsis</i>     | <i>Castanopsis hainanensis</i> Merr.                                 |
| Fagaceae         | <i>Castanopsis</i>     | <i>Castanopsis tonkinensis</i> Seemen                                |
| Fagaceae         | <i>Quercus</i>         | <i>Quercus blakei</i> Skan                                           |
| Icacinaeae       | <i>Apodytes</i>        | <i>Apodytes dimidiata</i> E. Meyer (ex Drege ex Bernhardt) ex Arn.   |
| Icacinaeae       | <i>Platea</i>          | <i>Platea latifolia</i> Blume                                        |
| Ixonanthaceae    | <i>Ixonanthes</i>      | <i>Ixonanthes reticulata</i> Jack                                    |
| Juglandaceae     | <i>Engelhardia</i>     | <i>Engelhardia roxburghiana</i> Wall.                                |
| Lamiaceae        | <i>Vitex</i>           | <i>Vitex quinata</i> (Lour.) Will.                                   |
| Lauraceae        | <i>Cryptocarya</i>     | <i>Cryptocarya maclurei</i> Merr.                                    |
| Lauraceae        | <i>Litsea</i>          | <i>Litsea baviensis</i> Lec.                                         |
| Lauraceae        | <i>Lindera</i>         | <i>Lindera kwangtungensis</i> (Liou) Allen                           |
| Lauraceae        | <i>Phoebe</i>          | <i>Phoebe hungmoensis</i> S. K. Lee                                  |
| Lauraceae        | <i>Cryptocarya</i>     | <i>Cryptocarya chinensis</i> (Hance) Hemsl.                          |
| Lauraceae        | <i>Litsea</i>          | <i>Litsea elongata</i> (Wall. ex Nees) Benth. et Hook. f.            |
| Lauraceae        | <i>Cinnamomum</i>      | <i>Cinnamomum tsoi</i> Allen                                         |

|                  |                        |                                                                      |
|------------------|------------------------|----------------------------------------------------------------------|
| Lauraceae        | <i>Alseodaphnopsis</i> | <i>Alseodaphnopsis hainanensis</i> (Merr.) H. W. Li & J. Li          |
| Lauraceae        | <i>Machilus</i>        | <i>Machilus robusta</i> W. W. Smith                                  |
| Lauraceae        | <i>Cryptocarya</i>     | <i>Cryptocarya hainanensis</i> Merr.                                 |
| Lauraceae        | <i>Machilus</i>        | <i>Machilus chinensis</i> (Champ. ex Benth.) Hemsl.                  |
| Lauraceae        | <i>Neolitsea</i>       | <i>Neolitsea oblongifolia</i> Merr. et Chun                          |
| Malvaceae        | <i>Microcos</i>        | <i>Microcos chungii</i> (Merr.) Chun                                 |
| Malvaceae        | <i>Firmiana</i>        | <i>Firmiana hainanensis</i> Kosterm.                                 |
| Malvaceae        | <i>Sterculia</i>       | <i>Sterculia lanceolata</i> Cav.                                     |
| Melastomataceae  | <i>Memecylon</i>       | <i>Memecylon ligustrifolium</i> Champ.                               |
| Meliaceae        | <i>Aglaia</i>          | <i>Aglaia spectabilis</i> (Miquel) S. S. Jain & Bennet               |
| Moraceae         | <i>Ficus</i>           | <i>Ficus virens</i> Aiton                                            |
| Moraceae         | <i>Ficus</i>           | <i>Ficus langkokensis</i> Drake                                      |
| Moraceae         | <i>Ficus</i>           | <i>Ficus fistulosa</i> Reinw. ex Bl.                                 |
| Moraceae         | <i>Artocarpus</i>      | <i>Artocarpus styracifolius</i> Pierre                               |
| Moraceae         | <i>Ficus</i>           | <i>Ficus vasculosa</i> Wall. ex Miq.                                 |
| Myrtaceae        | <i>Syzygium</i>        | <i>Syzygium buxifolium</i> Hook. et Arn.                             |
| Myrtaceae        | <i>Syzygium</i>        | <i>Syzygium globiflorum</i> (Craib) P. Chantananarothai & J. Parnell |
| Myrtaceae        | <i>Syzygium</i>        | <i>Syzygium acuminatissimum</i> (Blume) Candolle                     |
| Myrtaceae        | <i>Syzygium</i>        | <i>Syzygium chunianum</i> Merr. et Perry                             |
| Pentaphylacaceae | <i>Adinandra</i>       | <i>Adinandra hainanensis</i> Hayata                                  |
| Pentaphylacaceae | <i>Eurya</i>           | <i>Eurya ciliata</i> Merr.                                           |
| Pentaphylacaceae | <i>Eurya</i>           | <i>Eurya nitida</i> Korthals                                         |
| Phyllanthaceae   | <i>Bridelia</i>        | <i>Bridelia balansae</i> Tutcher                                     |
| Phyllanthaceae   | <i>Baccaurea</i>       | <i>Baccaurea ramiflora</i> Loureiro                                  |
| Phyllanthaceae   | <i>Bischofia</i>       | <i>Bischofia polycarpa</i> (Levl.) Airy Shaw                         |
| Podocarpaceae    | <i>Dacrycarpus</i>     | <i>Dacrycarpus imbricatus</i> (Blume) de Laubenfels                  |
| Podocarpaceae    | <i>Podocarpus</i>      | <i>Podocarpus neriifolius</i> D. Don                                 |
| Polygalaceae     | <i>Xanthophyllum</i>   | <i>Xanthophyllum hainanense</i> Hu                                   |
| Primulaceae      | <i>Myrsine</i>         | <i>Myrsine africana</i> L.                                           |
| Primulaceae      | <i>Ardisia</i>         | <i>Ardisia densilepidotula</i> Merr.                                 |
| Proteaceae       | <i>Helicia</i>         | <i>Helicia hainanensis</i> Hayata                                    |
| Rubiaceae        | <i>Tarennoidea</i>     | <i>Tarennoidea wallichii</i> (Hook. f.) Tirveng. et C. Sastre        |
| Rubiaceae        | <i>Wendlandia</i>      | <i>Wendlandia uvariifolia</i> Hance                                  |
| Rubiaceae        | <i>Nauclea</i>         | <i>Nauclea officinalis</i> (Pirre ex Pitard) Merr.                   |
| Rubiaceae        | <i>Psydrax</i>         | <i>Psydrax dicocca</i> Gaertner                                      |
| Rubiaceae        | <i>Psychotria</i>      | <i>Psychotria asiatica</i> Wall.                                     |
| Rutaceae         | <i>Acronychia</i>      | <i>Acronychia pedunculata</i> (L.) Miq.                              |
| Sabiaceae        | <i>Meliosma</i>        | <i>Meliosma angustifolia</i> Merr.                                   |
| Salicaceae       | <i>Homalium</i>        | <i>Homalium ceylanicum</i> (Gardn.) Benth.                           |
| Sapindaceae      | <i>Nephelium</i>       | <i>Nephelium topengii</i> (Merr.) H. S. Lo                           |
| Sapindaceae      | <i>Acer</i>            | <i>Acer fabri</i> Hance                                              |
| Sapindaceae      | <i>Litchi</i>          | <i>Litchi chinensis</i> Sonn.                                        |
| Sapotaceae       | <i>Sarcosperma</i>     | <i>Sarcosperma laurinum</i> (Benth.) Hook. f.                        |

---

|              |                    |                                              |
|--------------|--------------------|----------------------------------------------|
| Sapotaceae   | <i>Pouteria</i>    | <i>Pouteria annamensis</i> (Pierre) Baehni   |
| Styracaceae  | <i>Alniphyllum</i> | <i>Alniphyllum fortunei</i> (Hemsl.) Makino  |
| Symplocaceae | <i>Symplocos</i>   | <i>Symplocos adenophylla</i> Wall. ex G. Don |
| Symplocaceae | <i>Symplocos</i>   | <i>Symplocos glauca</i> (Thunb.) Koidz.      |
| Theaceae     | <i>Schima</i>      | <i>Schima superba</i> Gardn. et Champ.       |
| Theaceae     | <i>Camellia</i>    | <i>Camellia caudata</i> Wall.                |
| Urticaceae   | <i>Oreocnide</i>   | <i>Oreocnide rubescens</i> (Bl.) Miq.        |

---
